# Supplementary material
Source: MDPI journal article supplement (https://www.mdpi.com/2311-553X/9/2/20)
Supplement: s1 [file s1]

## Supplementary information to

### 1. Supplementary Tables

**Table S1. Primers used in the S-PolyT method for detection of mature miRNAs.** “Rev-polyT” is the universal miRNA-qPCR primer. “f-” refers to miRNA specific forward primers, “rt-” refers to reverse transcription primers. Lower case nucleotides (nts) in a miRNA-specific forward primer were added to the 5’ end to increase the T<sub>m</sub> of that primer. The last 6 nts (red) in the reverse primers were used to match a specific isoform of a miRNA. Lower case “a” and “b” at the end of reverse primers refer to the top-2 isoforms of a miRNA according to the abundance (RPM).

| Name                | Sequence (5’ to 3’)                                              |
|---------------------|------------------------------------------------------------------|
| Rev-polyT           | CAGTGCAGGGTCCGAGGT                                               |
| f-miR-375-3p        | TTTGTTTCGTTCCGGCTCGCG                                            |
| rt-miR-375-3p-polyT | CAGTGCAGGGTCCGAGGTCAGAGCCACCTGGGCAATTTTTT<br>TTTTT <b>CGCGAG</b> |
| f-miR-7-5p          | cccgTGGAAGACTAGTGATTTTG                                          |
| rt-miR-7-5p-polyT   | CAGTGCAGGGTCCGAGGTCAGAGCCACCTGGGCAATTTTTT<br>TTTTT <b>AACAAA</b> |
| f-miR-148a-3p       | cgcTCAGTGCACCTACAGAACTT                                          |

|                      |                                                                  |
|----------------------|------------------------------------------------------------------|
| rt-miR-148a-3p-polyT | CAGTGCAGGGTCCGAGGTCAGAGCCACCTGGGCAATTTTTT<br>TTTTT <b>AGACAA</b> |
| f-miR-26a-5p         | ctcgTTCAAGTAATCCAGGATAG                                          |
| rt-miR-26a-5p-polyTa | CAGTGCAGGGTCCGAGGTCAGAGCCACCTGGGCAATTTTTT<br>TTTTT <b>AGCCTA</b> |
| rt-miR-26a-5p-polyTb | CAGTGCAGGGTCCGAGGTCAGAGCCACCTGGGCAATTTTTT<br>TTTTT <b>CTATCC</b> |
| f-miR-217-5p         | gcATACTGCATCAGGAAGTGA                                            |
| rt-miR-217-5p-polyT  | CAGTGCAGGGTCCGAGGTCAGAGCCACCTGGGCAATTTTTT<br>TTTTT <b>CAGTTC</b> |
| f-miR-27a-3p         | cgcTTCACAGTGGCTAAGTTC                                            |
| rt-miR-27a-3p-polyT  | CAGTGCAGGGTCCGAGGTCAGAGCCACCTGGGCAATTTTTT<br>TTTTT <b>GAACTT</b> |
| f-miR-21-5p          | cgcTAGCTTATCAGACTGATGT                                           |
| rt-miR-21-5p-polyTa  | CAGTGCAGGGTCCGAGGTCAGAGCCACCTGGGCAATTTTTT<br>TTTTT <b>AACATC</b> |
| rt-miR-21-5p-polyTb  | CAGTGCAGGGTCCGAGGTCAGAGCCACCTGGGCAATTTTTT<br>TTTTT <b>ACATCA</b> |
| f-miR-143-3p         | cgcTGAGATGAAGCACTGTAG                                            |
| rt-miR-143-3p-polyTa | CAGTGCAGGGTCCGAGGTCAGAGCCACCTGGGCAATTTTTT<br>TTTTT <b>GAGCTA</b> |
| rt-miR-143-3p-polyTb | CAGTGCAGGGTCCGAGGTCAGAGCCACCTGGGCAATTTTTT<br>TTTTT <b>AGCTAC</b> |



## 2. Supplementary figures

**Figure S1.** Immunofluorescent staining of pancreatic tissue, islets, and acinar cells. In the native pancreas, islets (insulin-positive) were surrounded by acinar cells (amylase positive) (left). After digestion of pancreatic tissue, islets were separated from acinar cells by purification, as indicated by the marker insulin and amylase respectively (right).

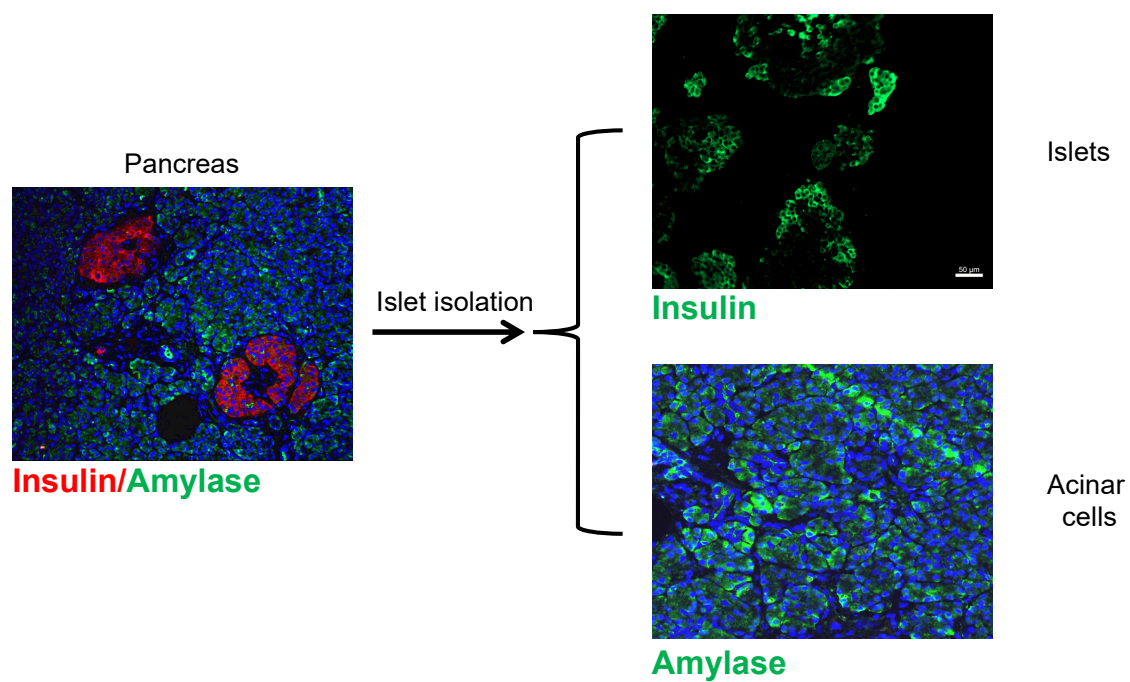

**Figure S2.** Characterization of the four miRge predicted novel miRNAs. (A) The four-candidate pancreas miRNAs with high read counts. (B) to (E): mFold predicted secondary structure and folding energy of the precursor miRNA (pre-miR) of the novel miRNAs.

A

| Name   | Tissue          | Chromosome | Start Position | End Position | Strand | Mature miRNA sequence  | Arm type | Read Count  |
|--------|-----------------|------------|----------------|--------------|--------|------------------------|----------|-------------|
| miR-P1 | acinus<br>islet | chr21      | 35720770       | 35720790     | +      | AGGAGAAUCUUUGUCACUUAG  | 3p       | 3096<br>962 |
| miR-P2 | islet           | chr19      | 4770738        | 4770758      | +      | CAACAAGUCACAGCCGGCCUC  | 3p       | 1093        |
| miR-P3 | islet           | chr2       | 219294165      | 219294185    | -      | GUCAUUUUUGUGAUCUGCAGCU | 5p       | 814         |
| miR-P4 | acinus<br>islet | chrX       | 151959640      | 151959660    | -      | UCAGUCUCAUCUGCAAAGAAGU | 3p       | 1088<br>833 |

B pre-miR-P1, bases 1 to 91, initial  $\Delta G = -32.90$

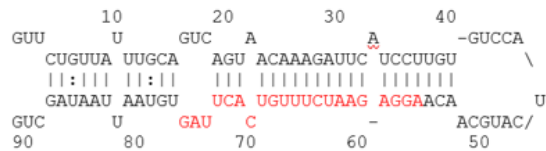

C pre-miR-P2, bases 1 to 90, initial  $\Delta G = -34.60$

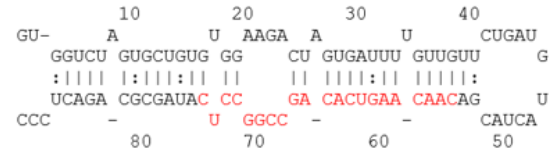

D pre-miR-P3, bases 1 to 90, initial  $\Delta G = -48.10$

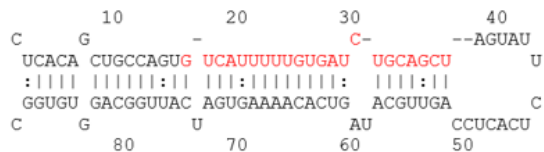

E pre-miR-P4, bases 1 to 91, initial  $\Delta G = -41.60$

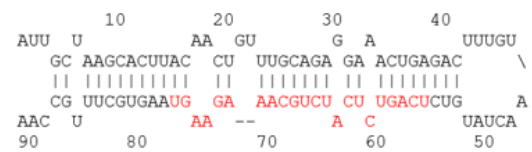

**Figure S3. miRNA profiling in rodents.** (A) Reanalysis of published miRNA profiling in murine samples. Pie chart plot of miRNAs with read counts over 1% of total miRNA read counts. (B) Reanalysis of published miRNA profiling in murine islets. Pie chart plot of miRNAs with read counts over 1% of total miRNA read counts. (C) Bar plot of highly expression miRNAs in murine alpha-TC1, beta- TC-6, and MIN6 cells. (D) Pie chart plot of reanalyzed published highly expressed miRNAs in murine MIN6 cells. (E) Bar plot of highly expressed miRNAs in rat INS1 cells.

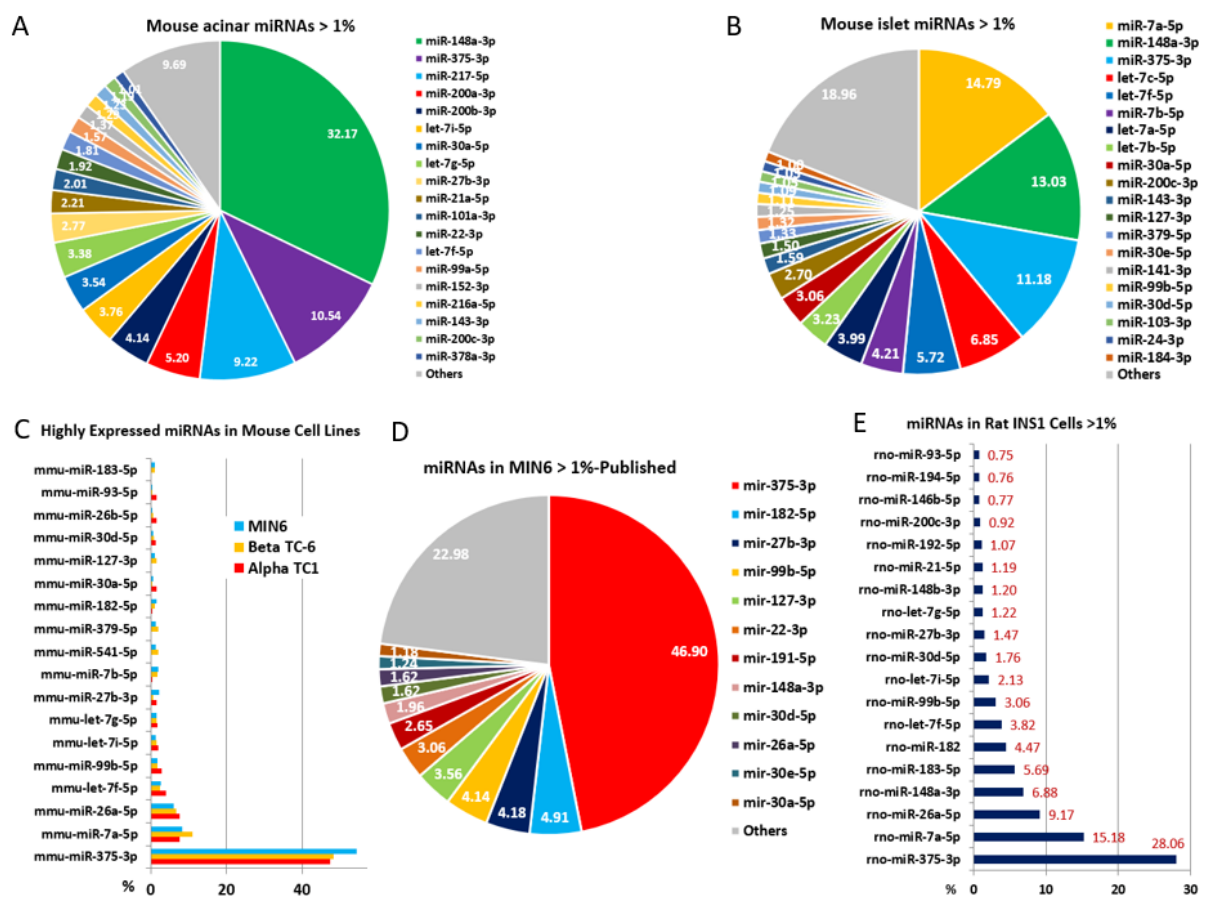

**Figure S4. KEGG pathway view of islet-genes are experimentally validated targets of miR-148a-3p, miR-375, and miR-7-p.** All islet-genes that are experimentally validated targets of (A) miR-7-5p, (B) miR-148a-3p, or (C) miR-375 were input into Pathview to generate KEGG pathway graph of insulin signaling pathway (hsa04910). If the node of a protein is labeled in white, no targets from the three miRNAs is involved in regulating this protein. Nodes labeled from yellow to green to red color indicate that increased number of targets are correlated with the protein at this node in the pathway.

**A.**

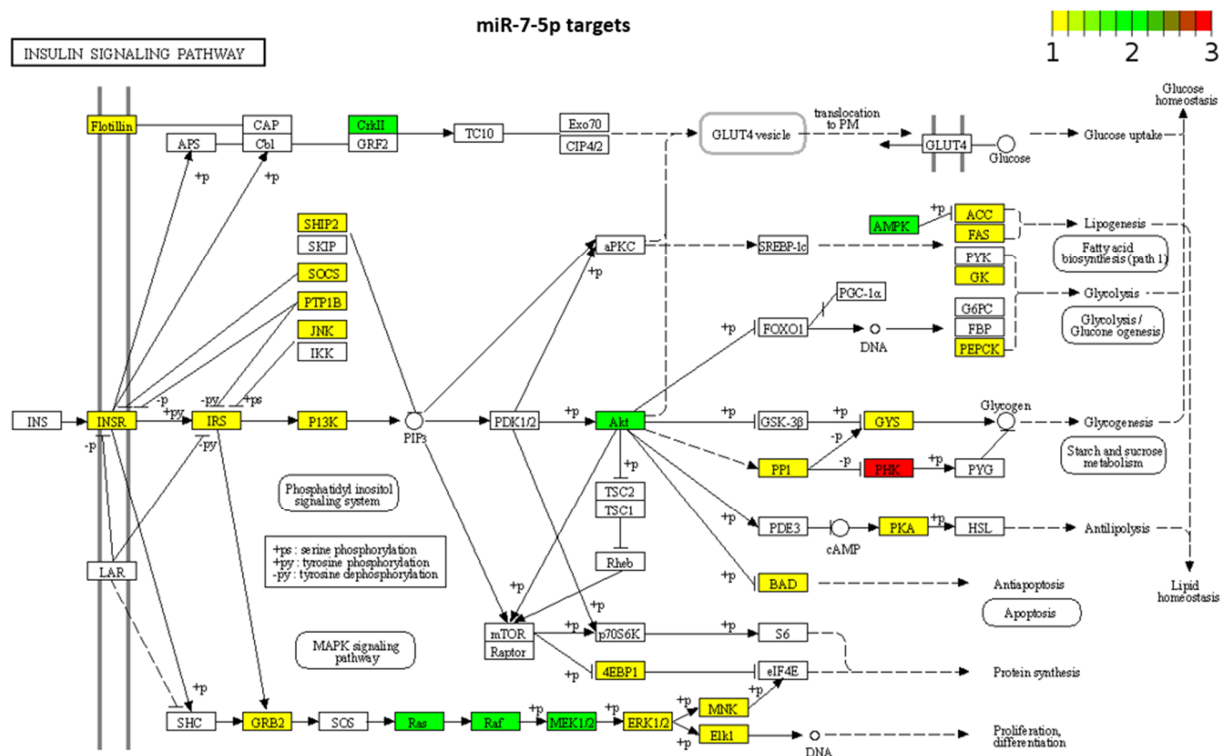

B.

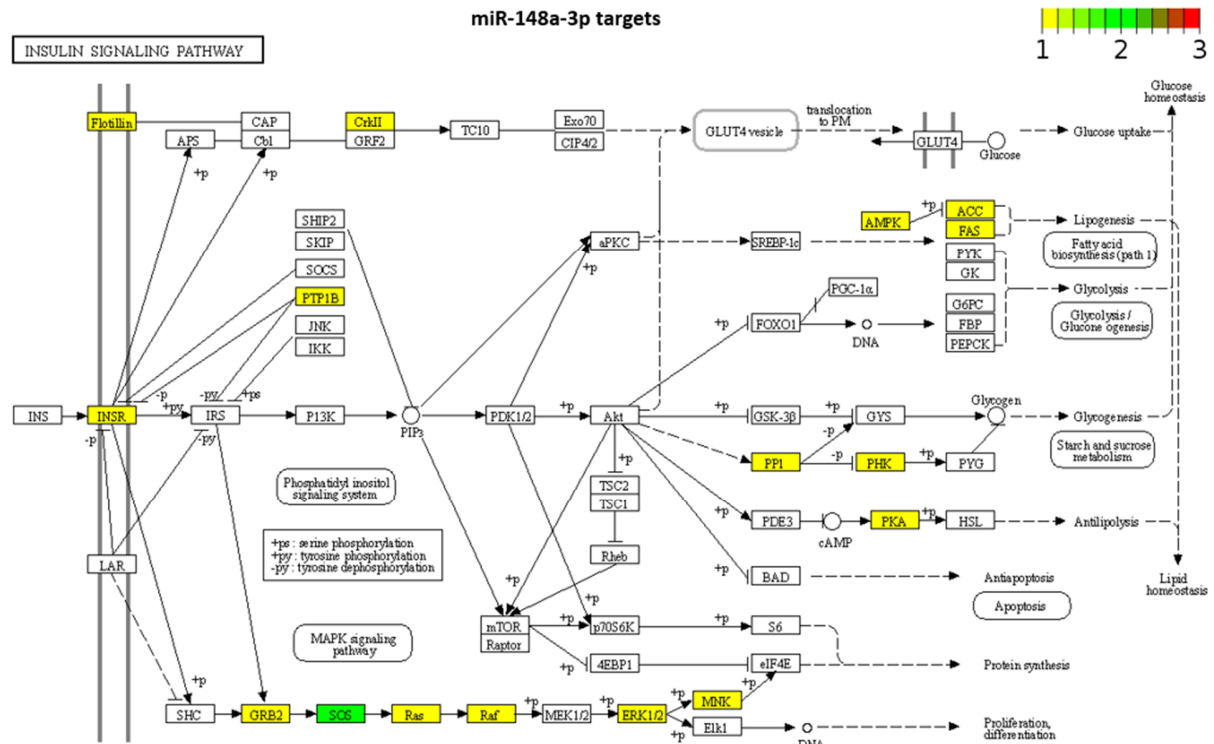

C.

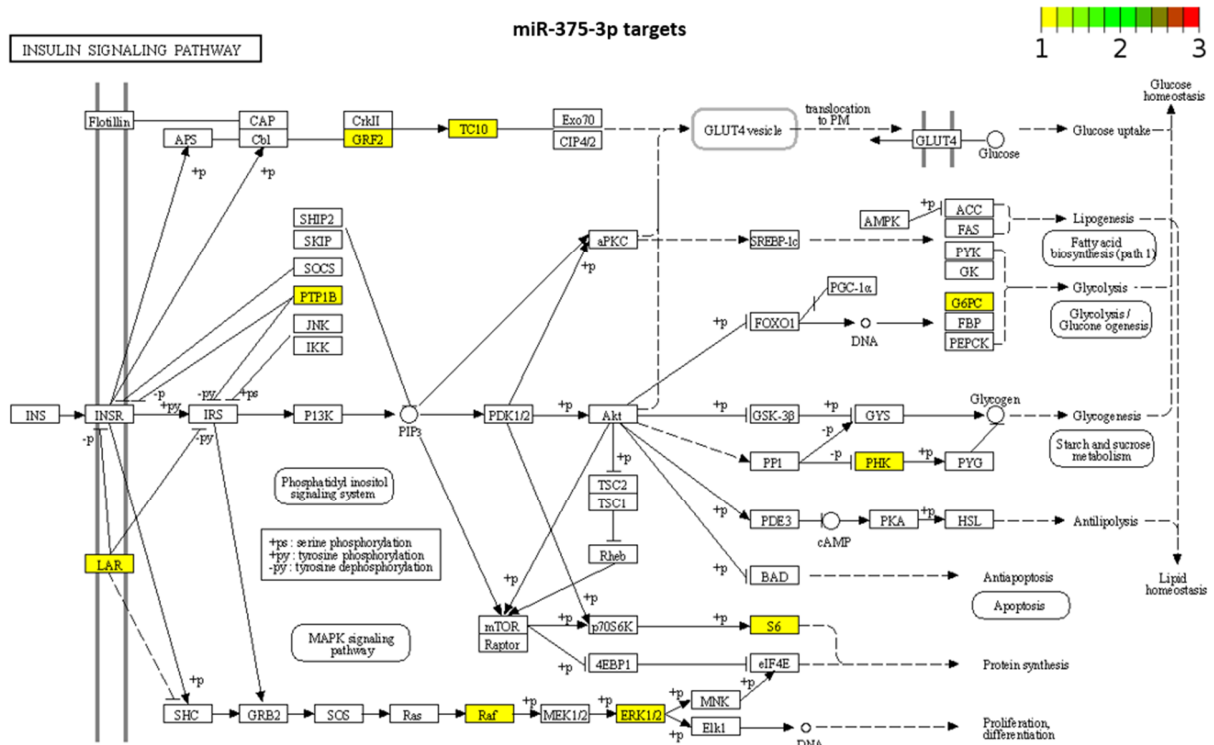



### **3. Supplementary data files**

File\_S1\_List of essential pancreatic genes.xlsx: the list of essential pancreatic genes used to analyze miRNA targets

File\_S2\_Human islets and acinar cells miRNA count.xlsx: miRge analyzed raw read counts of miRNAs in individual human islet and acinar cells samples: “i” indicate islet samples and “a” indicate acinar cell samples.

File\_S3\_Novel miRNAs in human islets and acinar cells.xlsx: all miRge predicted novel miRNAs in human islets and acinar tissues

File\_S4\_DEseq2\_results\_condition\_islet\_vs\_acinar.xlsx: DEseq2 analyzed differential expressed miRNAs in islets versus acinar cells

File\_S5\_Rodent cell line miRNA read count.xlsx: miRge analyzed raw read counts of miRNAs in rodent cell lines

File\_S6\_Pancreas cell genes that are TargetScan predicted targets.xlsx: TargetScan predicted targets that are genes expressed in pancreas

File\_S7\_Islet-genes and essential genes are validated targets of miR-375, miR-7-5p, and miR-148a-3p
